# Supplementary material for: Agent-Based Model of Human Alveoli Predicts Chemotactic Signaling by Epithelial Cells during Early Aspergillus fumigatus Infection
Source: PubMed Central journal article supplement (PMC4216106; doi:10.1371/journal.pone.0111630), 2014-10-31
Supplement: pone.0111630.s004.pdf [file pone.0111630.s004.pdf]

**Table S1. Average run-time for one timestep  $t_{\text{run},\Delta t}$  of agent-based simulations for different breathing conditions and migration modes.** Mean run-times and their corresponding standard deviation are averaged over  $10^5$  runs in the static case and averaged over  $10^3$  runs under resting and heavy exercise breathing conditions.

| $t_{\text{run},\Delta t}$     | breathing condition    |                        |                        |
|-------------------------------|------------------------|------------------------|------------------------|
|                               | static case            | resting condition      | heavy exercise         |
| $\Delta t$                    | 0.1 min                | 0.001 min              | 0.001 min              |
| persistent random walk        | $(0.217 \pm 0.075)$ ms | $(0.210 \pm 0.074)$ ms | $(0.209 \pm 0.069)$ ms |
| biased persistent random walk | $(0.238 \pm 0.109)$ ms | $(0.224 \pm 0.099)$ ms | $(0.222 \pm 0.098)$ ms |
