# Supplementary material for: Agent-Based Model of Human Alveoli Predicts Chemotactic Signaling by Epithelial Cells during Early Aspergillus fumigatus Infection
Source: PubMed Central journal article supplement (PMC4216106; doi:10.1371/journal.pone.0111630), 2014-10-31
Supplement: pone.0111630.s005.pdf [file pone.0111630.s005.pdf]

**Table S2. Calibrated input rates  $\lambda_{\text{in}}$  for the different migration mode parameter configurations of AM.**

| $\lambda_{\text{in}}$ [ $\text{min}^{-1}$ ] |     | $v$ [ $\mu\text{m}/\text{min}$ ] |         |         |          |        |
|---------------------------------------------|-----|----------------------------------|---------|---------|----------|--------|
|                                             |     | 2                                | 4       | 6       | 8        | 10     |
| $t_{\text{p}}$ [min]                        | 0.5 | 0.0056                           | 0.01125 | 0.01675 | 0.021875 | 0.0275 |
|                                             | 1   | 0.005725                         | 0.01125 | 0.01675 | 0.0225   | 0.0275 |
|                                             | 2   | 0.005725                         | 0.0115  | 0.01725 | 0.0225   | 0.028  |
|                                             | 4   | 0.006                            | 0.0115  | 0.01725 | 0.0225   | 0.028  |
